# Supplementary material for: An in situ transmission electron microscopy study of sintering and redispersion phenomena over size-selected metal nanoparticles: environmental effects
Source: Royal Society of Chemistry journal article supplement (doi:10.1039/c4cp02574a), 2014-01-01
Supplement: c4cp02574a1.pdf [file c4cp02574a1.pdf]

***In situ* transmission electron microscopy study of sintering and redispersion phenomena  
over size-selected metal nanoparticles: environmental effects**

Farzad Behafarid<sup>1</sup>, Sudeep Pandey<sup>1</sup>, Rosa E. Diaz<sup>2</sup>, Eric A. Stach<sup>2</sup>, Beatriz Roldan Cuenya<sup>3\*</sup>

<sup>1</sup>Department of Physics, University of Central Florida, Orlando, FL 32816

<sup>2</sup>Center of Functional Nanomaterials, Brookhaven National Laboratory, Upton, NY

<sup>3</sup>Department of Physics, Ruhr University Bochum, 44780 Bochum, Germany

\*e-mail: [Beatriz.Roldan@rub.de](mailto:Beatriz.Roldan@rub.de)

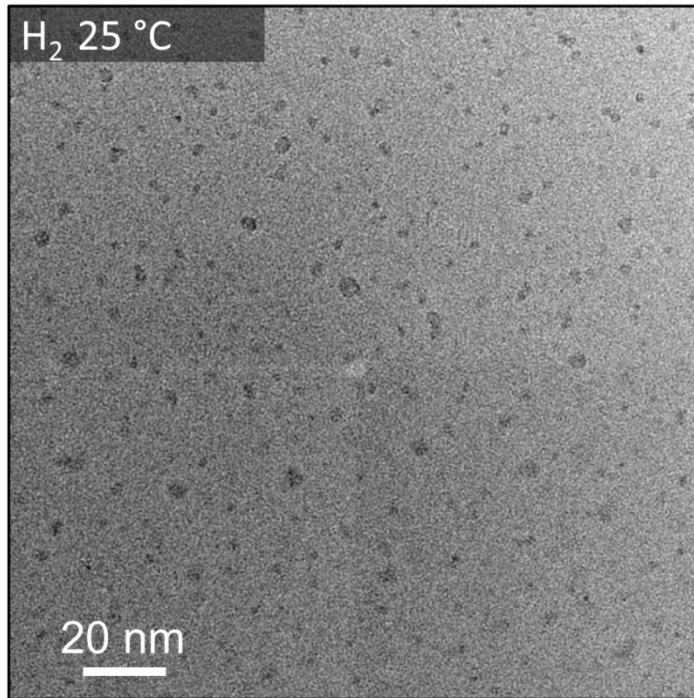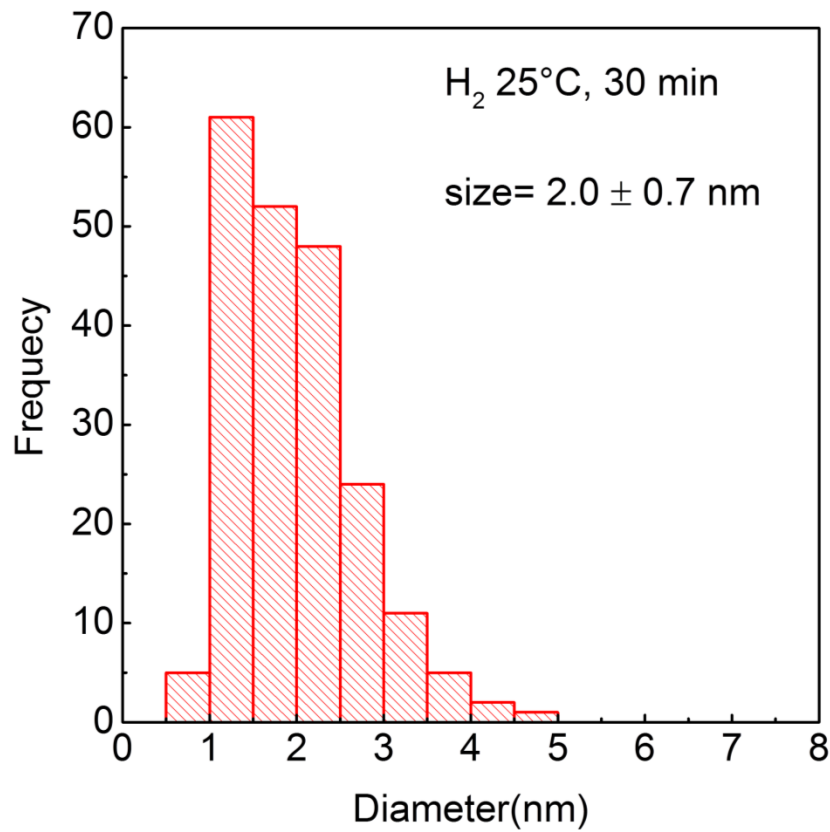

**Suppl. Fig. 1:** TEM image shown in Fig.1(a) of the main text and the corresponding size histogram.

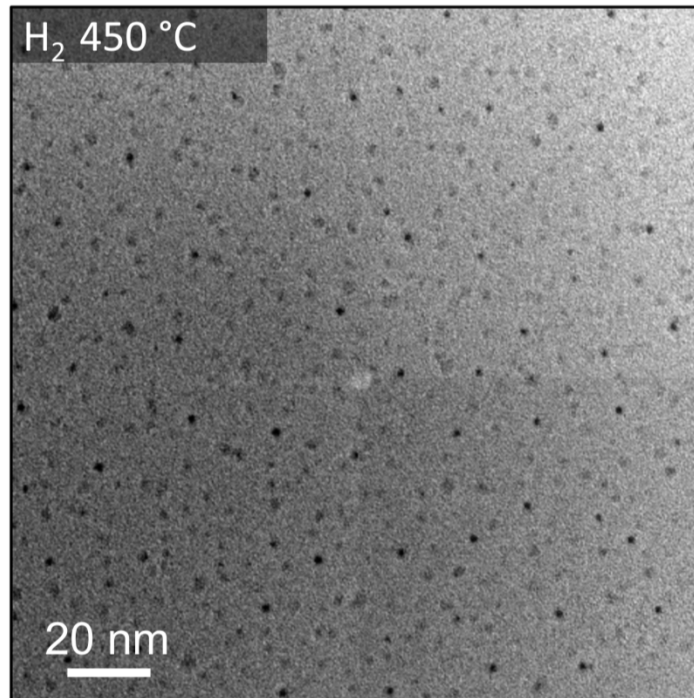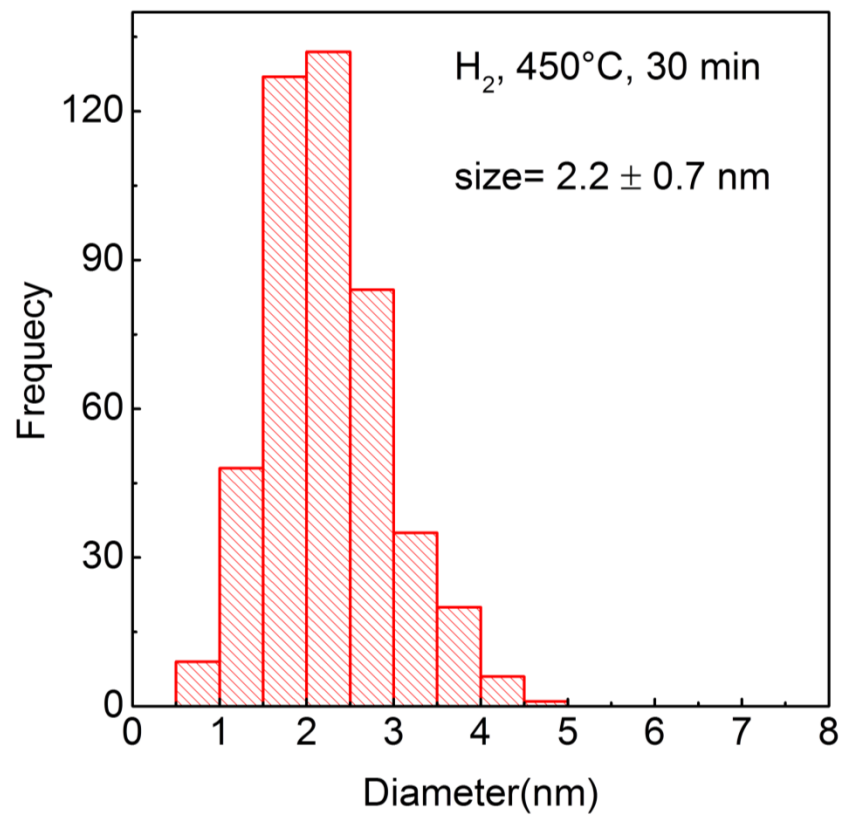

**Suppl. Fig. 2:** TEM image shown in Fig.1(b) of the main text and the corresponding size histogram.

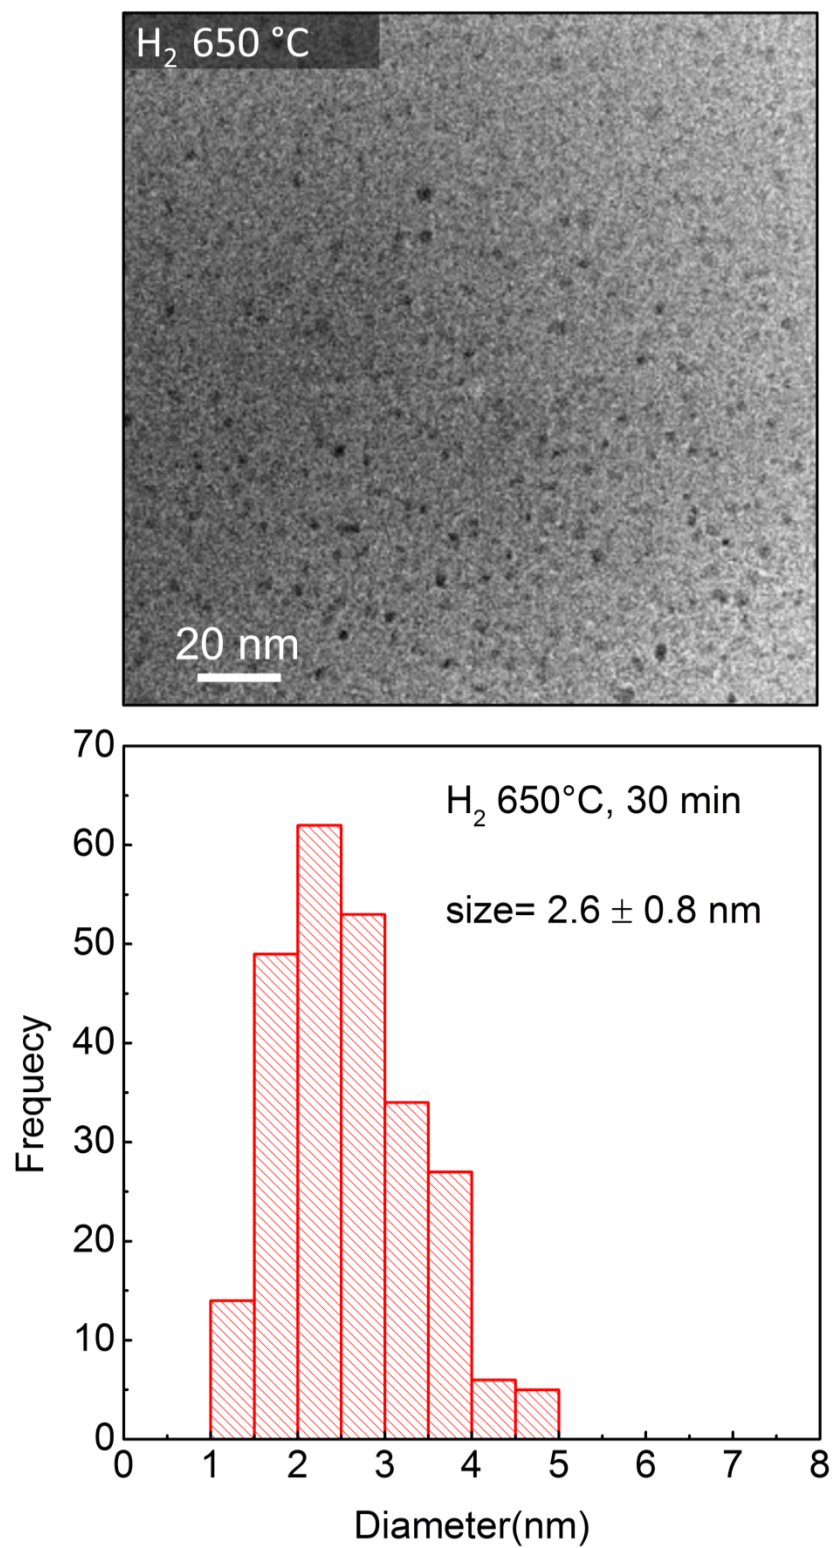

**Suppl. Fig. 3:** TEM image shown in Fig.1(c) of the main text and the corresponding size histogram.

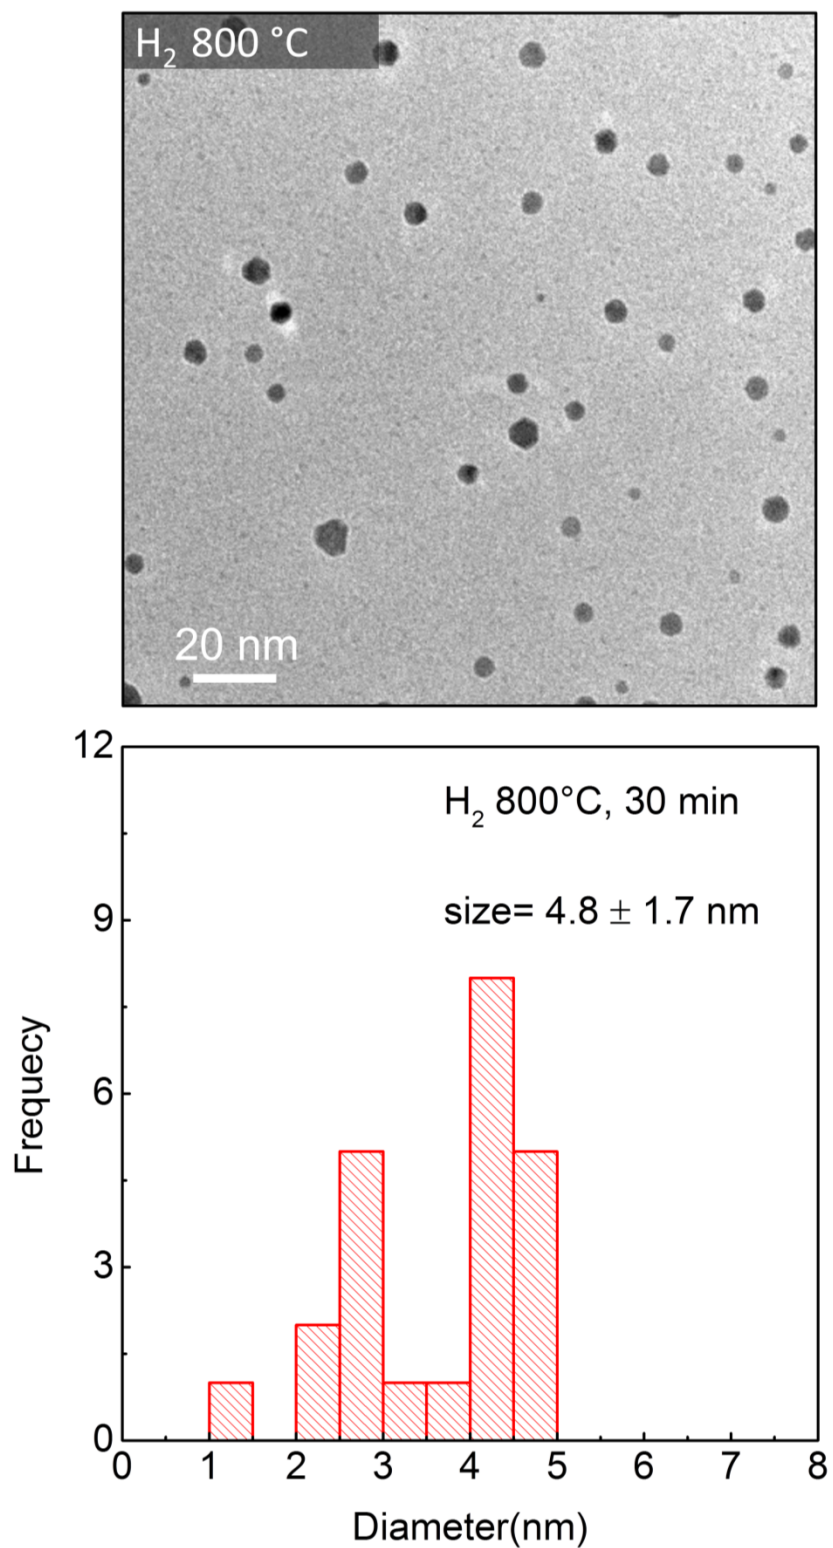

**Suppl. Fig. 4:** TEM image shown in Fig.1(d) of the main text and the corresponding size histogram.



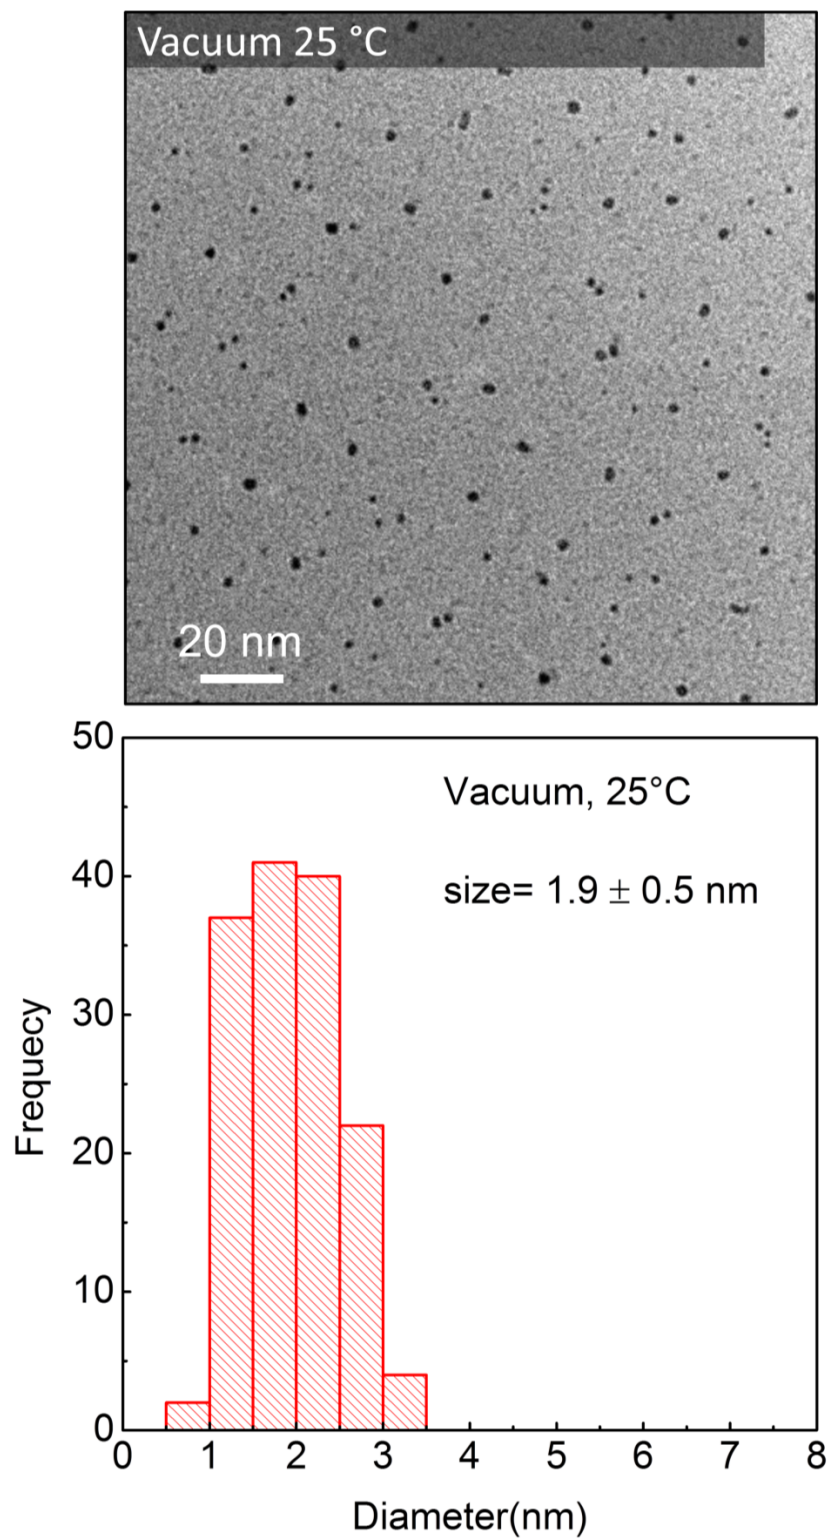

**Suppl. Fig. 5:** TEM image shown in Fig.2(a) of the main text and the corresponding size histogram.

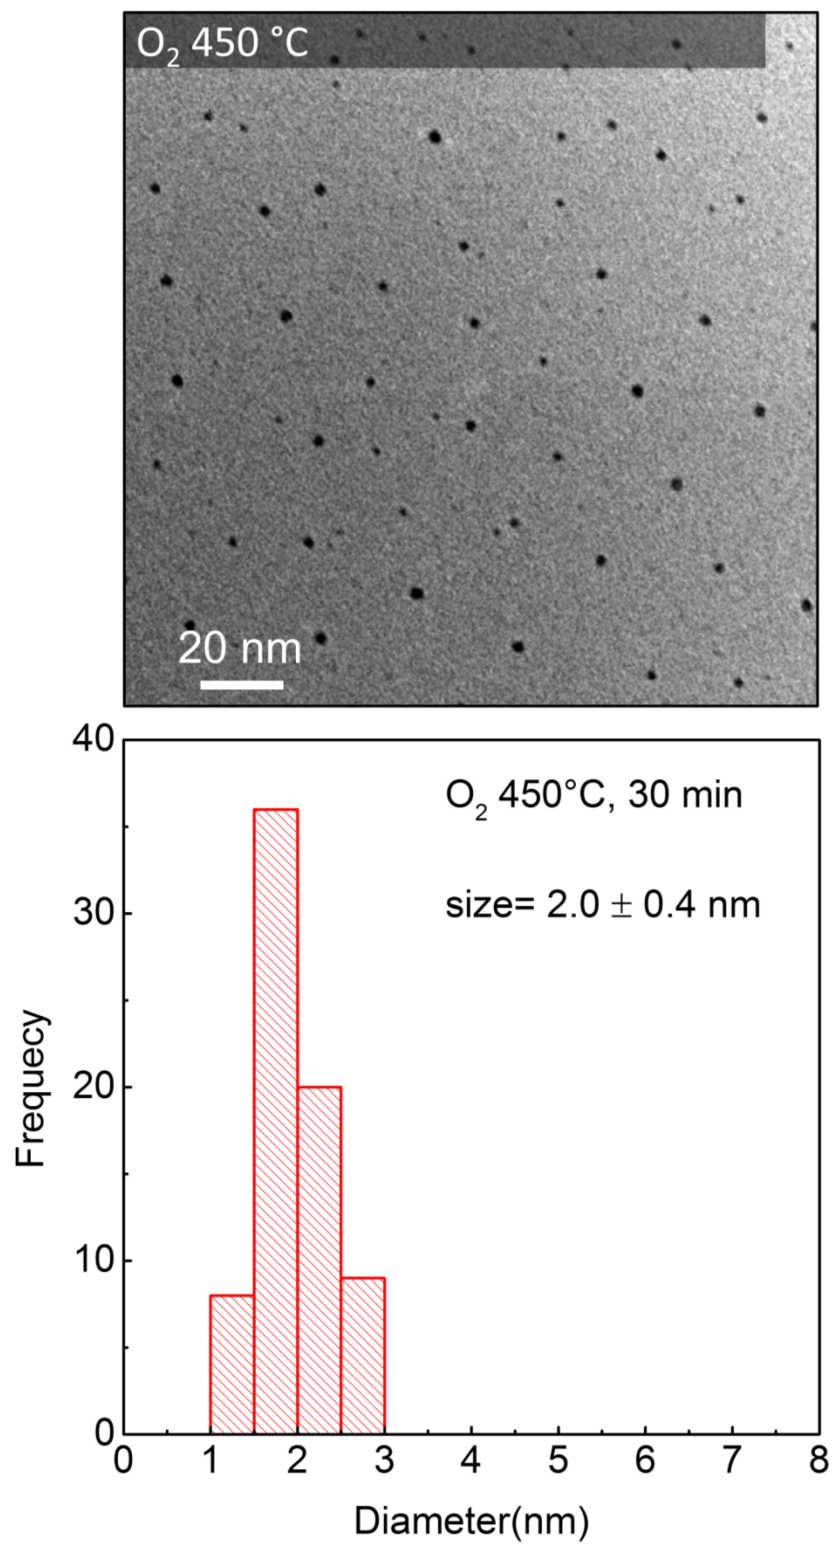

**Suppl. Fig. 6:** TEM image shown in Fig.2(b) of the main text and the corresponding size histogram.

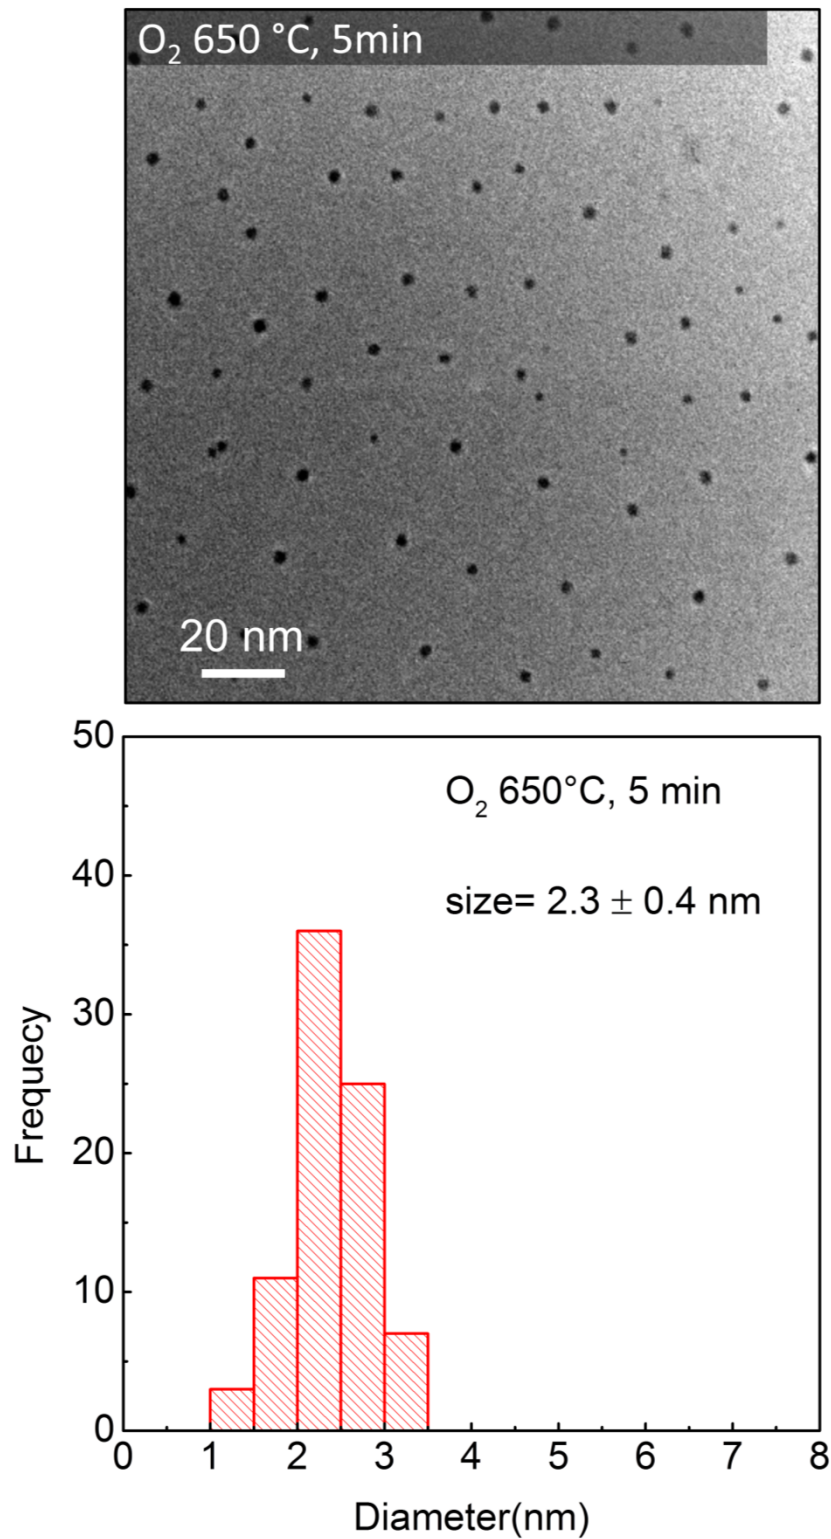

**Suppl. Fig. 7:** TEM image shown in Fig.2(c) of the main text and the corresponding size histogram.



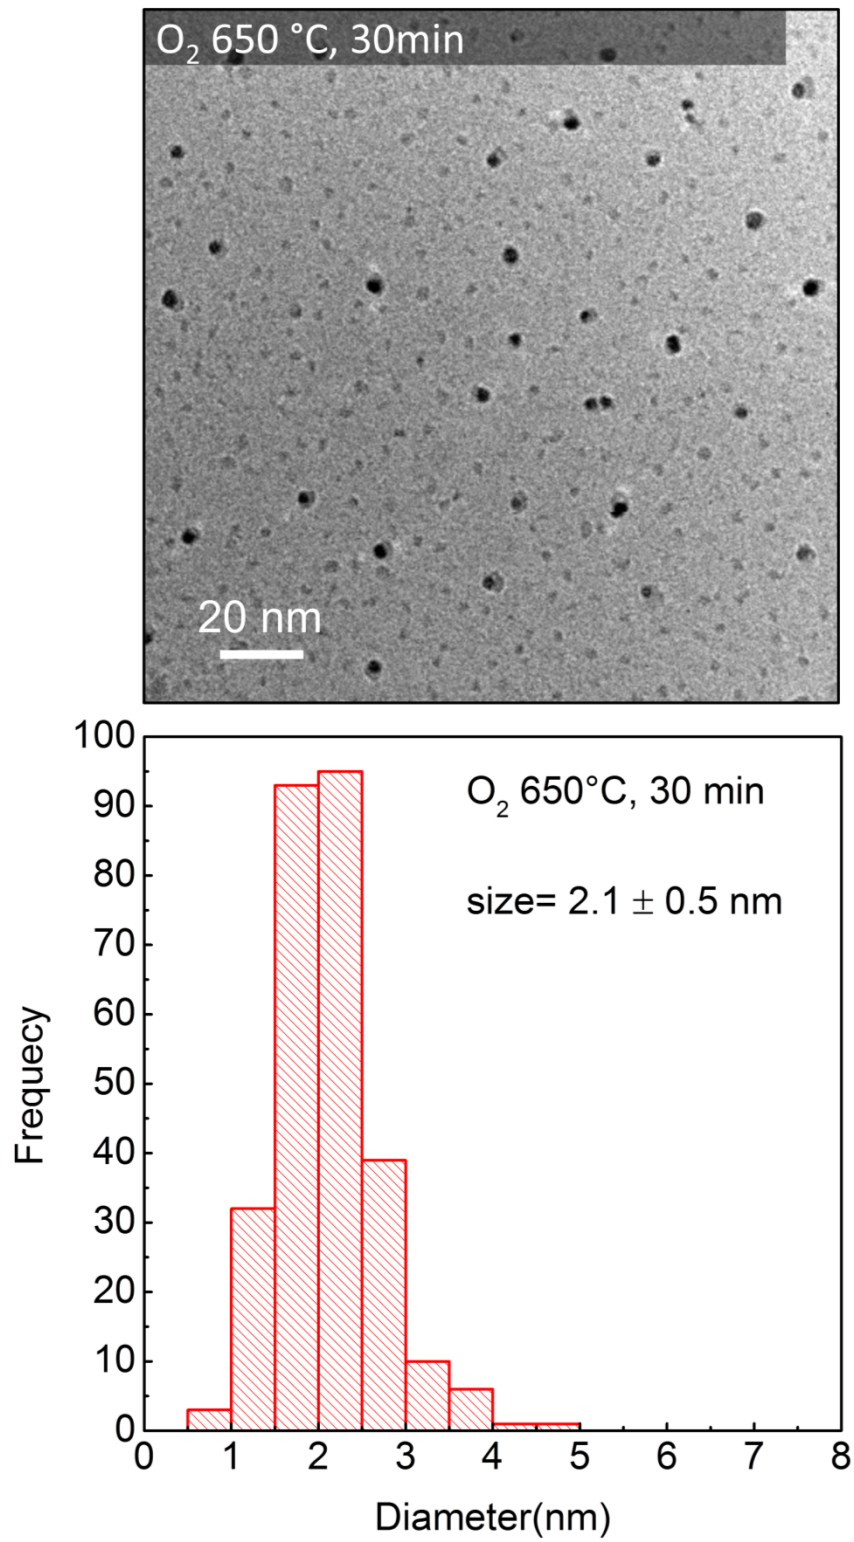

**Suppl. Fig. 8:** TEM image shown in Fig.2(d) of the main text and the corresponding size histogram.

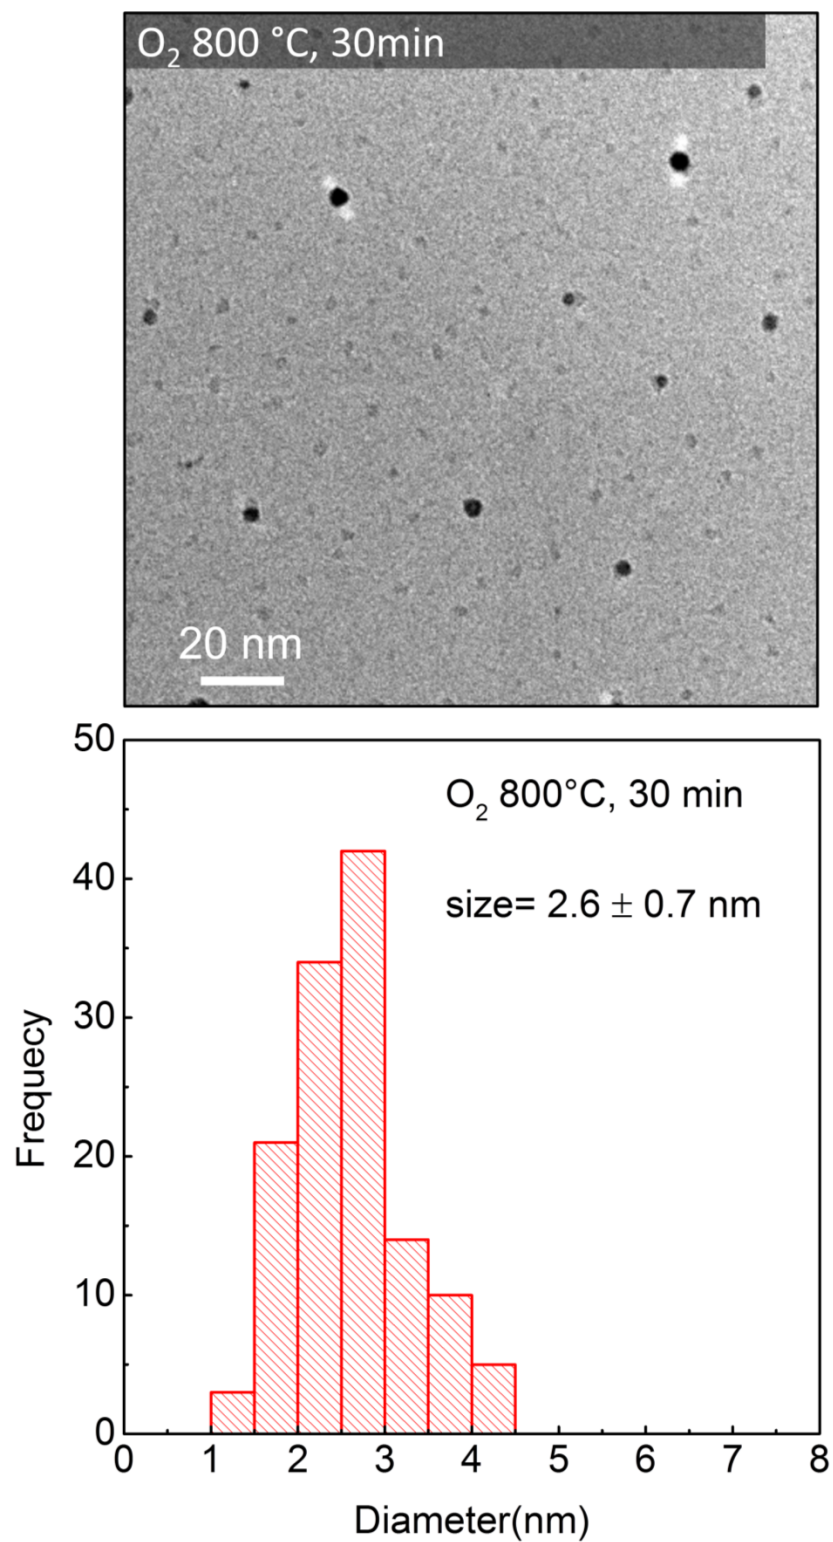

**Suppl. Fig. 9:** TEM image shown in Fig.2(e) of the main text and the corresponding size histogram.

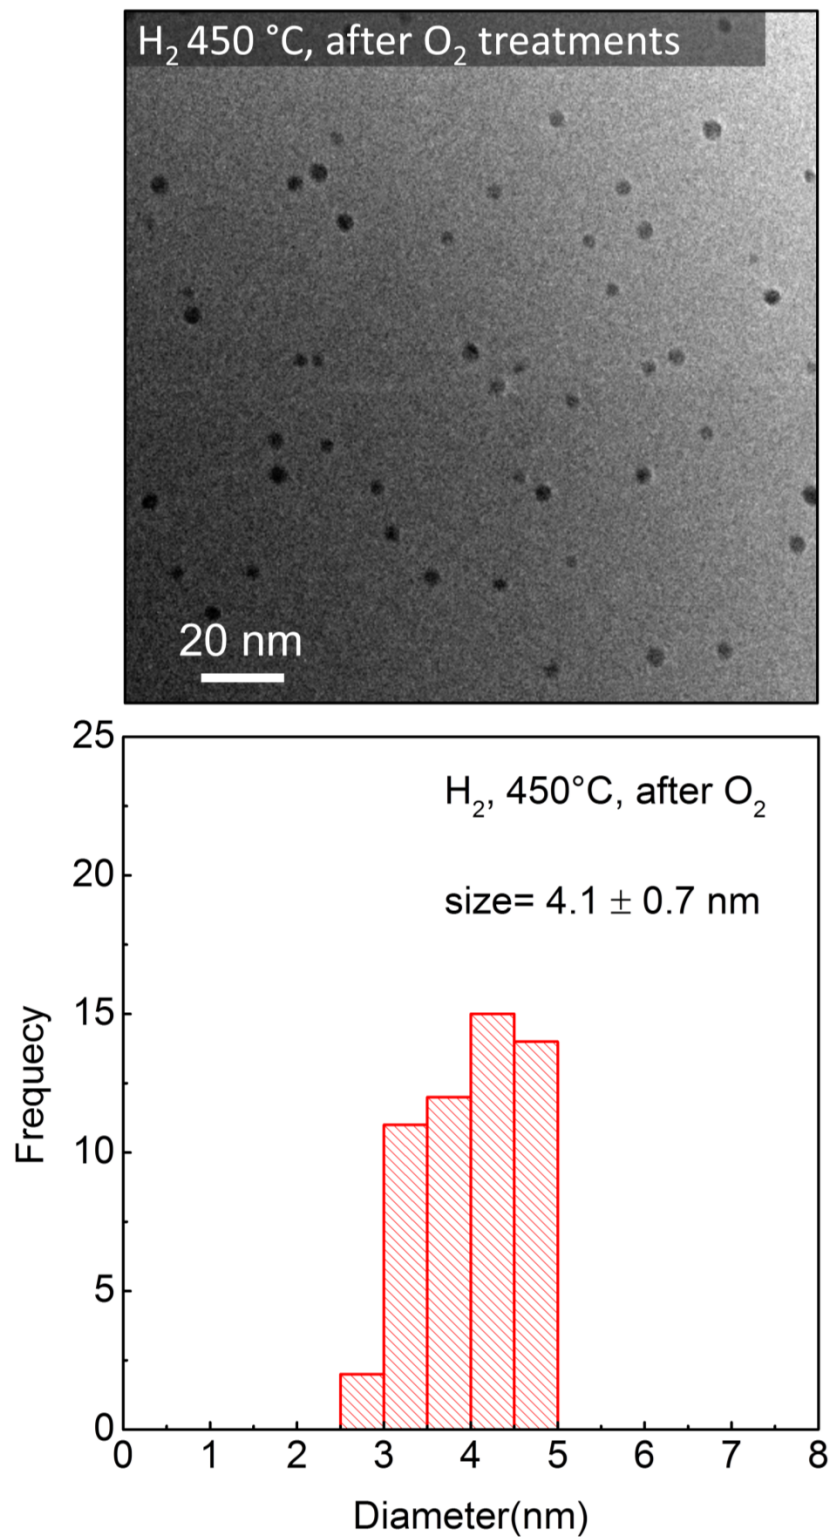

**Suppl. Fig. 10:** TEM image shown in Fig.2(f) of the main text and the corresponding size histogram.
